# Supplementary material for: Structural alignment of ZnO columns across multiple monolayer MoS2 layers as compliant substrates
Source: Royal Society of Chemistry journal article supplement (doi:10.1039/d4nr00724g), 2024-01-01
Supplement: d4nr00724g1.pdf [file d4nr00724g1.pdf]

## Supporting Information

### Structural alignment and enhanced crystallinity of ZnO columns across multiple monolayer MoS<sub>2</sub> layers as compliant substrates

Xuejing Wang<sup>1</sup>, Kyungtae Kim<sup>1</sup>, Benjamin K. Derby<sup>1</sup>, Terrence McGuckin<sup>2</sup>, Gabriel A.

Calderón<sup>3</sup>, Michael T. Pettes<sup>1</sup>, Jinwoo Hwang<sup>3</sup>, Yeonhoo Kim<sup>4</sup>, Jeongwon Park<sup>5</sup>, Aiping Chen<sup>1</sup>,

Kibum Kang<sup>5</sup>, Jinkyong Yoo<sup>1,\*</sup>

<sup>1</sup>Center for Integrated Nanotechnologies, Los Alamos National Laboratory, Los Alamos, NM  
87545, United States of America

<sup>2</sup>Ephemeron-Labs, Inc., Philadelphia, PA 19134, United States of America

<sup>3</sup>Department of Materials Science and Engineering, The Ohio State University, Columbus, OH  
43210, United States of America

<sup>4</sup>Interdisciplinary Materials Measurement Institute, Korea Research Institute of Standards and  
Science, Daejeon 34133, Republic of Korea

\*Corresponding author: [jyoo@lanl.gov](mailto:jyoo@lanl.gov)

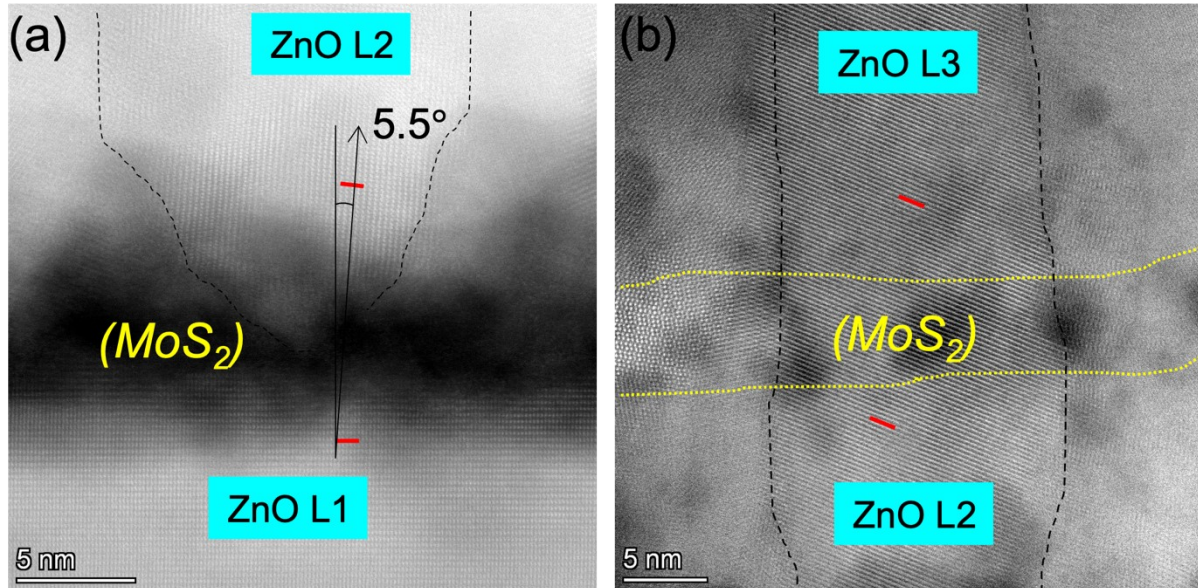

Figure S1. (a) HRSTEM at ZnO L1/L2 interface showing misaligned ZnO columns with a 5.5° angle rotation. (b) HRSTEM at ZnO L2/L3 interface showing aligned ZnO column without rotation.

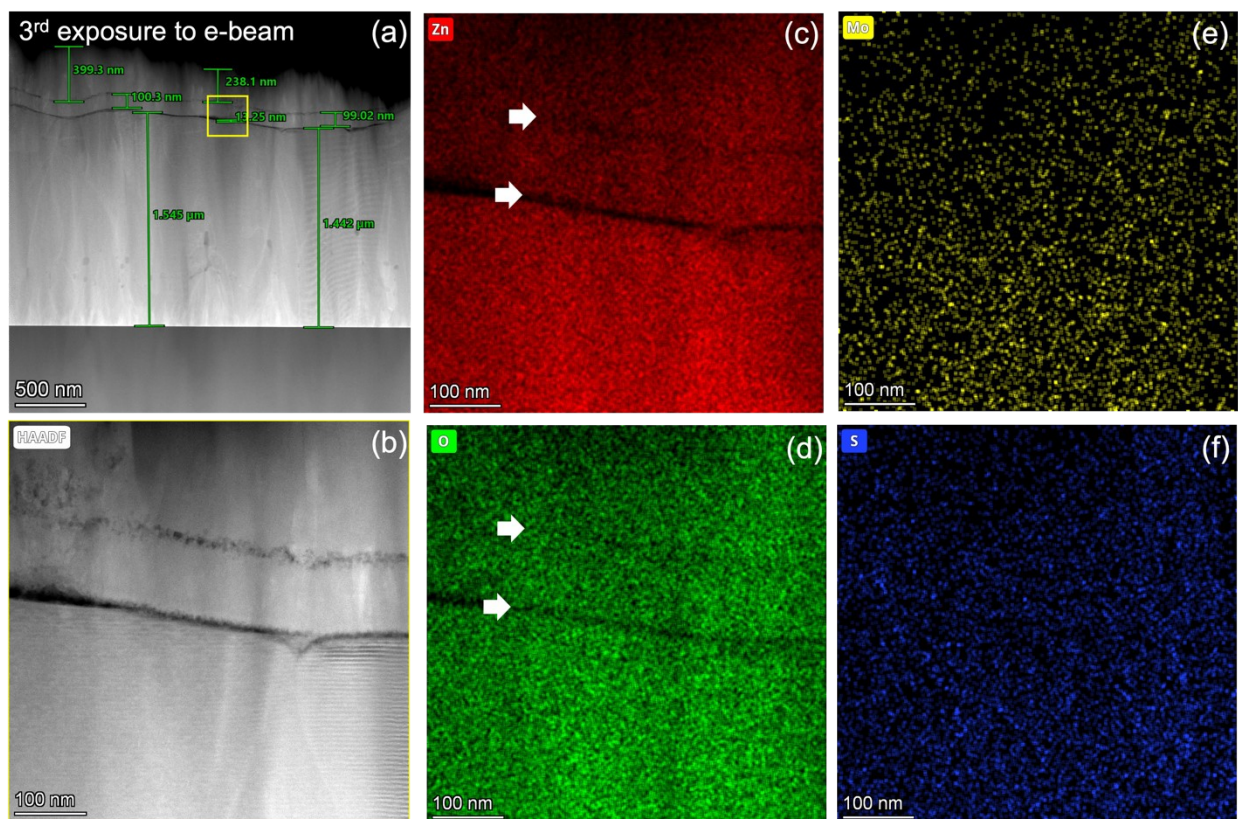

Figure S2 (a) Cross-sectional HAADF STEM micrograph imaged at the 3<sup>rd</sup> time. Dark contrast indicates damaged MoS<sub>2</sub> under 300kV electron beam. (b) Area selected for EDX mapping. (c-f) EDX mapping for Zn, O, Mo and S. The dark contrast lines (white arrows) of Zn and O maps suggest the position for original MoS<sub>2</sub> without interfacial diffusion. Mo and S are below detection limit indicating the monolayers were damaged during the repeated *e*-beam exposure.
